# Supplementary material
Source: publisher site journal article supplement (https://www.dovepress.com/article/444546)
Supplement: Supplementary file 1 [file get_supplementary_file.php]

**Suppl_table 1**: Results of prediction of interaction between miRNAs from GTEX and 3’UTR of *BRCA1*.

| Input Gene | Input Mirna | Transcript | Mirna | biotype | ENCODE isoform | Amplified UTR | Start | Stop | Agreement | Computational Predictions | Confirmed Predictions | Computational Predictions (method|target-site|start|stop|score) |
| --- | --- | --- | --- | --- | --- | --- | --- | --- | --- | --- | --- | --- |
| BRCA1 | hsa-mir-3934-5p | ENST00000357654 | hsa-mir-3934-5p | protein_coding | PRINCIPAL | false | 713 | 735 | 1.14046413185896 | 1 | 0 | Miranda|7mer-m8|713|735|1.14046413185896| |
| BRCA1 | hsa-mir-3934-3p | ENST00000357654 | hsa-mir-3934-3p | protein_coding | PRINCIPAL | false | 563 | 583 | 1.09932462580615 | 1 | 0 | Miranda|N/A|563|583|1.09932462580615| |
| BRCA1 | hsa-mir-6753-5p | ENST00000357654 | hsa-mir-6753-5p | protein_coding | PRINCIPAL | false | 90 | 112 | 1.08561145712188 | 1 | 0 | Miranda|6mer+|90|112|1.08561145712188| |
| BRCA1 | hsa-mir-6753-5p | ENST00000357654 | hsa-mir-6753-5p | protein_coding | PRINCIPAL | false | 54 | 75 | 1.04447195106906 | 1 | 0 | Miranda|Offset 3-8 6mer|54|75|1.04447195106906| |
| BRCA1 | hsa-mir-100-3p | ENST00000357654 | hsa-mir-100-3p | protein_coding | PRINCIPAL | false | 982 | 988 | -0.867719716603201 | 1 | 0 | Pita|8mer|982|988|-0.867719716603201| |
| BRCA1 | hsa-mir-199a-5p | ENST00000357654 | hsa-mir-199a-5p | protein_coding | PRINCIPAL | false | 620 | 642 | 1.08561145712188 | 1 | 0 | Miranda|7mer-1A|620|642|1.08561145712188| |
| BRCA1 | hsa-mir-186-5p | ENST00000357654 | hsa-mir-186-5p | protein_coding | PRINCIPAL | false | 294 | 315 | 1.04447195106906 | 1 | 1 | Miranda|7mer-m8|294|315|1.04447195106906| |
| BRCA1 | hsa-mir-573 | ENST00000357654 | hsa-mir-573 | protein_coding | PRINCIPAL | false | 757 | 778 | 1.19531680659605 | 1 | 0 | Miranda|7mer-m8|757|778|1.19531680659605| |
| BRCA1 | hsa-mir-4496 | ENST00000357654 | hsa-mir-4496 | protein_coding | PRINCIPAL | false | 984 | 990 | -0.867747142940569 | 1 | 0 | Pita|8mer|984|990|-0.867747142940569| |
| BRCA1 | hsa-mir-4742-5p | ENST00000357654 | hsa-mir-4742-5p | protein_coding | PRINCIPAL | false | 1181 | 1201 | 1.09932462580615 | 1 | 0 | Miranda|N/A|1181|1201|1.09932462580615| |
| BRCA1 | hsa-mir-616-3p | ENST00000357654 | hsa-mir-616-3p | protein_coding | PRINCIPAL | false | 976 | 982 | -0.868240817013203 | 1 | 0 | Pita|8mer|976|982|-0.868240817013203| |
| BRCA1 | hsa-mir-616-3p | ENST00000357654 | hsa-mir-616-3p | protein_coding | PRINCIPAL | false | 426 | 447 | 1.12675096317469 | 1 | 0 | Miranda|N/A|426|447|1.12675096317469| |
| BRCA1 | hsa-mir-7-5p | ENST00000357654 | hsa-mir-7-5p | protein_coding | PRINCIPAL | false | 984 | 990 | -0.867747142940569 | 1 | 0 | Pita|8mer|984|990|-0.867747142940569| |
| BRCA1 | hsa-mir-7-5p | ENST00000357654 | hsa-mir-7-5p | protein_coding | PRINCIPAL | false | 1254 | 1277 | 1.29130898738596 | 1 | 0 | Miranda|7mer-m8|1254|1277|1.29130898738596| |
| BRCA1 | hsa-mir-4742-3p | ENST00000357654 | hsa-mir-4742-3p | protein_coding | PRINCIPAL | false | 683 | 705 | 1.0718982884376 | 1 | 0 | Miranda|8mer|683|705|1.0718982884376| |
| BRCA1 | hsa-mir-1244 | ENST00000357654 | hsa-mir-1244 | protein_coding | PRINCIPAL | false | 726 | 749 | 1.08561145712188 | 1 | 0 | Miranda|N/A|726|749|1.08561145712188| |
| BRCA1 | hsa-mir-6807-5p | ENST00000357654 | hsa-mir-6807-5p | protein_coding | PRINCIPAL | false | 573 | 594 | 1.04447195106906 | 1 | 0 | Miranda|7mer-m8|573|594|1.04447195106906| |
| BRCA1 | hsa-mir-6807-5p | ENST00000357654 | hsa-mir-6807-5p | protein_coding | PRINCIPAL | false | 835 | 856 | 1.04447195106906 | 1 | 0 | Miranda|8mer|835|856|1.04447195106906| |
| BRCA1 | hsa-mir-186-3p | ENST00000357654 | hsa-mir-186-3p | protein_coding | PRINCIPAL | false | 594 | 618 | 1.05818511975333 | 1 | 0 | Miranda|8mer|594|618|1.05818511975333| |
| BRCA1 | hsa-mir-22-5p | ENST00000357654 | hsa-mir-22-5p | protein_coding | PRINCIPAL | false | 1192 | 1214 | 1.05818511975333 | 1 | 0 | Miranda|Offset 3-8 6mer|1192|1214|1.05818511975333| |
| BRCA1 | hsa-mir-99a-3p | ENST00000357654 | hsa-mir-99a-3p | protein_coding | PRINCIPAL | false | 29 | 49 | 1.23645631264887 | 1 | 0 | Miranda|7mer-1A|29|49|1.23645631264887| |
| BRCA1 | hsa-mir-570-3p | ENST00000357654 | hsa-mir-570-3p | protein_coding | PRINCIPAL | false | 1112 | 1133 | 1.04447195106906 | 1 | 0 | Miranda|N/A|1112|1133|1.04447195106906| |
| BRCA1 | hsa-mir-4257 | ENST00000357654 | hsa-mir-4257 | protein_coding | PRINCIPAL | false | 1056 | 1073 | 1.04447195106906 | 1 | 0 | Miranda|7mer-m8|1056|1073|1.04447195106906| |
| BRCA1 | hsa-mir-3681-5p | ENST00000357654 | hsa-mir-3681-5p | protein_coding | PRINCIPAL | false | 1029 | 1050 | 1.04447195106906 | 1 | 0 | Miranda|N/A|1029|1050|1.04447195106906| |
| BRCA1 | hsa-mir-6892-5p | ENST00000357654 | hsa-mir-6892-5p | protein_coding | PRINCIPAL | false | 152 | 172 | 1.30502215607023 | 1 | 0 | Miranda|8mer|152|172|1.30502215607023| |
| BRCA1 | hsa-mir-590-3p | ENST00000357654 | hsa-mir-590-3p | protein_coding | PRINCIPAL | false | 999 | 1018 | 1.05818511975333 | 1 | 0 | Miranda|Offset 3-8 6mer|999|1018|1.05818511975333| |
| BRCA1 | hsa-mir-590-3p | ENST00000357654 | hsa-mir-590-3p | protein_coding | PRINCIPAL | false | 1080 | 1100 | 1.04447195106906 | 1 | 0 | Miranda|Offset 3-8 6mer|1080|1100|1.04447195106906| |
| BRCA1 | hsa-mir-4435 | ENST00000357654 | hsa-mir-4435 | protein_coding | PRINCIPAL | false | 651 | 671 | 1.12675096317469 | 1 | 0 | Miranda|8mer|651|671|1.12675096317469| |
| BRCA1 | hsa-mir-4668-3p | ENST00000357654 | hsa-mir-4668-3p | protein_coding | PRINCIPAL | false | 939 | 962 | 1.05818511975333 | 1 | 0 | Miranda|6mer|939|962|1.05818511975333| |
| BRCA1 | hsa-mir-34a-3p | ENST00000357654 | hsa-mir-34a-3p | protein_coding | PRINCIPAL | false | 271 | 291 | 1.14046413185896 | 1 | 0 | Miranda|7mer-m8|271|291|1.14046413185896| |
| BRCA1 | hsa-mir-647 | ENST00000357654 | hsa-mir-647 | protein_coding | PRINCIPAL | false | 1 | 10 | 1.11303779449042 | 1 | 0 | Miranda|7mer-m8|1|10|1.11303779449042| |
| BRCA1 | hsa-mir-193b-5p | ENST00000357654 | hsa-mir-193b-5p | protein_coding | PRINCIPAL | false | 388 | 410 | 1.08561145712188 | 1 | 0 | Miranda|N/A|388|410|1.08561145712188| |
| BRCA1 | hsa-mir-193b-5p | ENST00000357654 | hsa-mir-193b-5p | protein_coding | PRINCIPAL | false | 665 | 686 | 1.0718982884376 | 1 | 0 | Miranda|8mer|665|686|1.0718982884376| |
| BRCA1 | hsa-mir-600 | ENST00000357654 | hsa-mir-600 | protein_coding | PRINCIPAL | false | 582 | 604 | 1.05818511975333 | 1 | 0 | Miranda|Offset 3-8 6mer|582|604|1.05818511975333| |
| BRCA1 | hsa-mir-762 | ENST00000357654 | hsa-mir-762 | protein_coding | PRINCIPAL | false | 1265 | 1284 | 1.05818511975333 | 1 | 0 | Miranda|N/A|1265|1284|1.05818511975333| |
| BRCA1 | hsa-mir-302b-3p | ENST00000357654 | hsa-mir-302b-3p | protein_coding | PRINCIPAL | false | 753 | 776 | 1.09932462580615 | 1 | 0 | Miranda|N/A|753|776|1.09932462580615| |
| BRCA1 | hsa-mir-302b-3p | ENST00000357654 | hsa-mir-302b-3p | protein_coding | PRINCIPAL | false | 592 | 614 | 1.05818511975333 | 1 | 0 | Miranda|7mer-m8|592|614|1.05818511975333| |
| BRCA1 | hsa-mir-3622a-3p | ENST00000357654 | hsa-mir-3622a-3p | protein_coding | PRINCIPAL | false | 734 | 755 | 1.04447195106906 | 1 | 0 | Miranda|7mer-m8|734|755|1.04447195106906| |
| BRCA1 | hsa-mir-17-5p | ENST00000357654 | hsa-mir-17-5p | protein_coding | PRINCIPAL | false | 593 | 615 | 1.38730116817586 | 1 | 1 | Miranda|7mer-m8|593|615|1.38730116817586| |

**Suppl_table 2**: Results of prediction of interaction between miRNAs from Geo and 3’UTR of *BRCA1*

| Input Gene | Input Mirna | Transcript | Mirna | biotype | ENCODE isoform | Amplified UTR | Start | Stop | Agreement | Computational Predictions | Confirmed Predictions | Computational Predictions (method|target-site|start|stop|score) |
| --- | --- | --- | --- | --- | --- | --- | --- | --- | --- | --- | --- | --- |
| BRCA1 | hsa-mir-150-5p | ENST00000357654 | hsa-mir-150-5p | protein_coding | PRINCIPAL | false | 599 | 620 | 1.04447195106906 | 1 | 0 | Miranda|7mer-m8|599|620|1.04447195106906| |
| BRCA1 | hsa-mir-328-5p | ENST00000357654 | hsa-mir-328-5p | protein_coding | PRINCIPAL | false | 1264 | 1287 | 0.27122787343157206 | 2 | 0 | Miranda|7mer-m8|1264|1287|1.37358799949159| |
| BRCA1 | hsa-mir-335-3p | ENST00000357654 | hsa-mir-335-3p | protein_coding | PRINCIPAL | false | 542 | 564 | 1.34616166212305 | 1 | 0 | Miranda|7mer-m8|542|564|1.34616166212305| |
| BRCA1 | hsa-mir-216b-5p | ENST00000357654 | hsa-mir-216b-5p | protein_coding | PRINCIPAL | false | 876 | 897 | 1.11303779449042 | 1 | 0 | Miranda|7mer-m8|876|897|1.11303779449042| |
| BRCA1 | hsa-mir-146b-5p | ENST00000357654 | hsa-mir-146b-5p | protein_coding | PRINCIPAL | false | 983 | 989 | -0.867719716603201 | 1 | 1 | Pita|8mer|983|989|-0.867719716603201| |
| BRCA1 | hsa-mir-146b-5p | ENST00000357654 | hsa-mir-146b-5p | protein_coding | PRINCIPAL | false | 490 | 507 | 1.18160363791178 | 1 | 1 | Miranda|8mer|490|507|1.18160363791178| |
| BRCA1 | hsa-mir-4284 | ENST00000357654 | hsa-mir-4284 | protein_coding | PRINCIPAL | false | 789 | 806 | 1.19531680659605 | 1 | 0 | Miranda|8mer|789|806|1.19531680659605| |
| BRCA1 | hsa-mir-518e-3p | ENST00000357654 | hsa-mir-518e-3p | protein_coding | PRINCIPAL | false | 439 | 459 | 1.14046413185896 | 1 | 0 | Miranda|N/A|439|459|1.14046413185896| |
| BRCA1 | hsa-mir-186-3p | ENST00000357654 | hsa-mir-186-3p | protein_coding | PRINCIPAL | false | 594 | 618 | 1.05818511975333 | 1 | 0 | Miranda|8mer|594|618|1.05818511975333| |
| BRCA1 | hsa-mir-708-5p | ENST00000357654 | hsa-mir-708-5p | protein_coding | PRINCIPAL | false | 60 | 82 | 1.15417730054324 | 1 | 0 | Miranda|7mer-m8|60|82|1.15417730054324| |
| BRCA1 | hsa-mir-214-5p | ENST00000357654 | hsa-mir-214-5p | protein_coding | PRINCIPAL | false | 980 | 986 | -0.86781570878399 | 1 | 0 | Pita|8mer|980|986|-0.86781570878399| |
| BRCA1 | hsa-mir-372-3p | ENST00000357654 | hsa-mir-372-3p | protein_coding | PRINCIPAL | false | 587 | 614 | 1.25016948133314 | 1 | 0 | Miranda|7mer-m8|587|614|1.25016948133314| |
| BRCA1 | hsa-mir-493-5p | ENST00000357654 | hsa-mir-493-5p | protein_coding | PRINCIPAL | false | 111 | 132 | 1.16789046922751 | 1 | 0 | Miranda|7mer-m8|111|132|1.16789046922751| |
| BRCA1 | hsa-mir-526b-5p | ENST00000357654 | hsa-mir-526b-5p | protein_coding | PRINCIPAL | false | 347 | 371 | 1.41472750554441 | 1 | 0 | Miranda|7mer-m8|347|371|1.41472750554441| |
| BRCA1 | hsa-mir-4673 | ENST00000357654 | hsa-mir-4673 | protein_coding | PRINCIPAL | false | 89 | 111 | 1.04447195106906 | 1 | 0 | Miranda|N/A|89|111|1.04447195106906| |
| BRCA1 | hsa-mir-125a-3p | ENST00000357654 | hsa-mir-125a-3p | protein_coding | PRINCIPAL | false | 220 | 241 | 1.0718982884376 | 1 | 0 | Miranda|8mer|220|241|1.0718982884376| |
| BRCA1 | hsa-mir-1468-3p | ENST00000357654 | hsa-mir-1468-3p | protein_coding | PRINCIPAL | false | 1178 | 1198 | 1.11303779449042 | 1 | 0 | Miranda|7mer-m8|1178|1198|1.11303779449042| |
| BRCA1 | hsa-let-7c-3p | ENST00000357654 | hsa-let-7c-3p | protein_coding | PRINCIPAL | false | 1303 | 1321 | 1.15417730054324 | 1 | 0 | Miranda|8mer|1303|1321|1.15417730054324| |
| BRCA1 | hsa-mir-512-3p | ENST00000357654 | hsa-mir-512-3p | protein_coding | PRINCIPAL | false | 592 | 613 | 1.16789046922751 | 1 | 0 | Miranda|7mer-m8|592|613|1.16789046922751| |
| BRCA1 | hsa-mir-1246 | ENST00000357654 | hsa-mir-1246 | protein_coding | PRINCIPAL | false | 103 | 109 | -0.879156499285883 | 1 | 0 | Targetscan|7mer-m8|103|109|-0.879156499285883| |
| BRCA1 | hsa-mir-1246 | ENST00000357654 | hsa-mir-1246 | protein_coding | PRINCIPAL | false | 1027 | 1049 | 1.08561145712188 | 1 | 0 | Miranda|7mer-m8|1027|1049|1.08561145712188| |
| BRCA1 | hsa-mir-557 | ENST00000357654 | hsa-mir-557 | protein_coding | PRINCIPAL | false | 1274 | 1298 | 1.08561145712188 | 1 | 0 | Miranda|N/A|1274|1298|1.08561145712188| |
| BRCA1 | hsa-mir-106b-3p | ENST00000357654 | hsa-mir-106b-3p | protein_coding | PRINCIPAL | false | 1273 | 1294 | 1.0718982884376 | 1 | 0 | Miranda|N/A|1273|1294|1.0718982884376| |
| BRCA1 | hsa-mir-1254 | ENST00000357654 | hsa-mir-1254 | protein_coding | PRINCIPAL | false | 46 | 69 | 1.12675096317469 | 1 | 0 | Miranda|7mer-m8|46|69|1.12675096317469| |
| BRCA1 | hsa-mir-429 | ENST00000357654 | hsa-mir-429 | protein_coding | PRINCIPAL | false | 982 | 988 | -0.867719716603201 | 1 | 0 | Pita|8mer|982|988|-0.867719716603201| |
| BRCA1 | hsa-mir-302c-3p | ENST00000357654 | hsa-mir-302c-3p | protein_coding | PRINCIPAL | false | 594 | 614 | 1.11303779449042 | 1 | 0 | Miranda|7mer-m8|594|614|1.11303779449042| |
| BRCA1 | hsa-mir-890 | ENST00000357654 | hsa-mir-890 | protein_coding | PRINCIPAL | false | 988 | 994 | -0.868158538001097 | 1 | 0 | Pita|8mer|988|994|-0.868158538001097| |
| BRCA1 | hsa-mir-345-5p | ENST00000357654 | hsa-mir-345-5p | protein_coding | PRINCIPAL | false | 413 | 434 | 1.12675096317469 | 1 | 0 | Miranda|8mer|413|434|1.12675096317469| |
| BRCA1 | hsa-mir-99a-3p | ENST00000357654 | hsa-mir-99a-3p | protein_coding | PRINCIPAL | false | 29 | 49 | 1.23645631264887 | 1 | 0 | Miranda|7mer-1A|29|49|1.23645631264887| |
| BRCA1 | hsa-mir-15b-5p | ENST00000357654 | hsa-mir-15b-5p | protein_coding | PRINCIPAL | false | 1328 | 1349 | 1.12675096317469 | 1 | 0 | Miranda|N/A|1328|1349|1.12675096317469| |
| BRCA1 | hsa-mir-212-3p | ENST00000357654 | hsa-mir-212-3p | protein_coding | PRINCIPAL | false | 830 | 851 | 1.15417730054324 | 1 | 1 | Miranda|Offset 3-8 6mer|830|851|1.15417730054324| |
| BRCA1 | hsa-mir-212-3p | ENST00000357654 | hsa-mir-212-3p | protein_coding | PRINCIPAL | false | 1229 | 1249 | 1.14046413185896 | 1 | 1 | Miranda|7mer-m8|1229|1249|1.14046413185896| |
| BRCA1 | hsa-mir-519d-3p | ENST00000357654 | hsa-mir-519d-3p | protein_coding | PRINCIPAL | false | 595 | 615 | 1.12675096317469 | 1 | 0 | Miranda|7mer-m8|595|615|1.12675096317469| |
| BRCA1 | hsa-mir-200a-3p | ENST00000357654 | hsa-mir-200a-3p | protein_coding | PRINCIPAL | false | 982 | 988 | -0.867719716603201 | 1 | 0 | Pita|8mer|982|988|-0.867719716603201| |
| BRCA1 | hsa-mir-939-5p | ENST00000357654 | hsa-mir-939-5p | protein_coding | PRINCIPAL | false | 58 | 83 | 1.16789046922751 | 1 | 0 | Miranda|N/A|58|83|1.16789046922751| |
| BRCA1 | hsa-mir-346 | ENST00000357654 | hsa-mir-346 | protein_coding | PRINCIPAL | false | 612 | 636 | 1.19531680659605 | 1 | 0 | Miranda|N/A|612|636|1.19531680659605| |
| BRCA1 | hsa-mir-522-3p | ENST00000357654 | hsa-mir-522-3p | protein_coding | PRINCIPAL | false | 244 | 261 | 1.19531680659605 | 1 | 0 | Miranda|8mer|244|261|1.19531680659605| |
| BRCA1 | hsa-mir-379-5p | ENST00000357654 | hsa-mir-379-5p | protein_coding | PRINCIPAL | false | 984 | 990 | -0.867747142940569 | 1 | 0 | Pita|8mer|984|990|-0.867747142940569| |
| BRCA1 | hsa-mir-218-5p | ENST00000357654 | hsa-mir-218-5p | protein_coding | PRINCIPAL | false | 328 | 352 | 1.20902997528032 | 1 | 0 | Miranda|7mer-m8|328|352|1.20902997528032| |
| BRCA1 | hsa-mir-362-5p | ENST00000357654 | hsa-mir-362-5p | protein_coding | PRINCIPAL | false | 142 | 166 | 1.08561145712188 | 1 | 0 | Miranda|N/A|142|166|1.08561145712188| |
| BRCA1 | hsa-mir-199a-5p | ENST00000357654 | hsa-mir-199a-5p | protein_coding | PRINCIPAL | false | 620 | 642 | 1.08561145712188 | 1 | 0 | Miranda|7mer-1A|620|642|1.08561145712188| |
| BRCA1 | hsa-mir-483-3p | ENST00000357654 | hsa-mir-483-3p | protein_coding | PRINCIPAL | false | 634 | 654 | 1.12675096317469 | 1 | 0 | Miranda|Offset 3-8 6mer|634|654|1.12675096317469| |
| BRCA1 | hsa-mir-186-5p | ENST00000357654 | hsa-mir-186-5p | protein_coding | PRINCIPAL | false | 294 | 315 | 1.04447195106906 | 1 | 1 | Miranda|7mer-m8|294|315|1.04447195106906| |
| BRCA1 | hsa-mir-1244 | ENST00000357654 | hsa-mir-1244 | protein_coding | PRINCIPAL | false | 726 | 749 | 1.08561145712188 | 1 | 0 | Miranda|N/A|726|749|1.08561145712188| |
| BRCA1 | hsa-mir-335-5p | ENST00000357654 | hsa-mir-335-5p | protein_coding | PRINCIPAL | false | 1015 | 1037 | 1.11303779449042 | 1 | 2 | Miranda|N/A|1015|1037|1.11303779449042| |
| BRCA1 | hsa-mir-875-3p | ENST00000357654 | hsa-mir-875-3p | protein_coding | PRINCIPAL | false | 48 | 67 | 1.11303779449042 | 1 | 0 | Miranda|7mer-m8|48|67|1.11303779449042| |
| BRCA1 | hsa-mir-383-5p | ENST00000357654 | hsa-mir-383-5p | protein_coding | PRINCIPAL | false | 988 | 994 | -0.868158538001097 | 1 | 0 | Pita|8mer|988|994|-0.868158538001097| |
| BRCA1 | hsa-mir-526b-3p | ENST00000357654 | hsa-mir-526b-3p | protein_coding | PRINCIPAL | false | 595 | 615 | 1.12675096317469 | 1 | 0 | Miranda|7mer-m8|595|615|1.12675096317469| |
| BRCA1 | hsa-mir-106b-5p | ENST00000357654 | hsa-mir-106b-5p | protein_coding | PRINCIPAL | false | 595 | 615 | 1.41472750554441 | 1 | 0 | Miranda|7mer-m8|595|615|1.41472750554441| |
| BRCA1 | hsa-mir-193b-5p | ENST00000357654 | hsa-mir-193b-5p | protein_coding | PRINCIPAL | false | 388 | 410 | 1.08561145712188 | 1 | 0 | Miranda|N/A|388|410|1.08561145712188| |
| BRCA1 | hsa-mir-193b-5p | ENST00000357654 | hsa-mir-193b-5p | protein_coding | PRINCIPAL | false | 665 | 686 | 1.0718982884376 | 1 | 0 | Miranda|8mer|665|686|1.0718982884376| |
| BRCA1 | hsa-mir-576-5p | ENST00000357654 | hsa-mir-576-5p | protein_coding | PRINCIPAL | false | 535 | 557 | 1.20902997528032 | 1 | 0 | Miranda|8mer|535|557|1.20902997528032| |
| BRCA1 | hsa-mir-378a-5p | ENST00000357654 | hsa-mir-378a-5p | protein_coding | PRINCIPAL | false | 628 | 651 | 1.34616166212305 | 1 | 0 | Miranda|7mer-m8|628|651|1.34616166212305| |
| BRCA1 | hsa-mir-944 | ENST00000357654 | hsa-mir-944 | protein_coding | PRINCIPAL | false | 1171 | 1194 | 1.12675096317469 | 1 | 0 | Miranda|7mer-m8|1171|1194|1.12675096317469| |
| BRCA1 | hsa-mir-337-5p | ENST00000357654 | hsa-mir-337-5p | protein_coding | PRINCIPAL | false | 1239 | 1259 | 1.04447195106906 | 1 | 0 | Miranda|N/A|1239|1259|1.04447195106906| |
| BRCA1 | hsa-mir-139-5p | ENST00000357654 | hsa-mir-139-5p | protein_coding | PRINCIPAL | false | 830 | 852 | 1.11303779449042 | 1 | 0 | Miranda|N/A|830|852|1.11303779449042| |
| BRCA1 | hsa-mir-452-5p | ENST00000357654 | hsa-mir-452-5p | protein_coding | PRINCIPAL | false | 979 | 985 | -0.867897987796096 | 1 | 0 | Pita|7mer-m8|979|985|-0.867897987796096| |
| BRCA1 | hsa-mir-224-5p | ENST00000357654 | hsa-mir-224-5p | protein_coding | PRINCIPAL | false | 457 | 478 | 1.33244849343877 | 1 | 0 | Miranda|8mer|457|478|1.33244849343877| |
| BRCA1 | hsa-mir-224-5p | ENST00000357654 | hsa-mir-224-5p | protein_coding | PRINCIPAL | false | 340 | 361 | 1.18160363791178 | 1 | 0 | Miranda|N/A|340|361|1.18160363791178| |
| BRCA1 | hsa-mir-766-3p | ENST00000357654 | hsa-mir-766-3p | protein_coding | PRINCIPAL | false | 327 | 347 | 1.08561145712188 | 1 | 0 | Miranda|Offset 3-8 6mer|327|347|1.08561145712188| |
| BRCA1 | hsa-mir-645 | ENST00000357654 | hsa-mir-645 | protein_coding | PRINCIPAL | false | 817 | 834 | 1.08561145712188 | 1 | 0 | Miranda|N/A|817|834|1.08561145712188| |
| BRCA1 | hsa-mir-93-5p | ENST00000357654 | hsa-mir-93-5p | protein_coding | PRINCIPAL | false | 593 | 615 | 1.38730116817586 | 1 | 0 | Miranda|7mer-m8|593|615|1.38730116817586| |
| BRCA1 | hsa-mir-921 | ENST00000357654 | hsa-mir-921 | protein_coding | PRINCIPAL | false | 978 | 1003 | 1.08561145712188 | 1 | 0 | Miranda|N/A|978|1003|1.08561145712188| |
| BRCA1 | hsa-mir-146a-5p | ENST00000357654 | hsa-mir-146a-5p | protein_coding | PRINCIPAL | false | 983 | 989 | -0.867719716603201 | 1 | 2 | Pita|8mer|983|989|-0.867719716603201| |
| BRCA1 | hsa-mir-146a-5p | ENST00000357654 | hsa-mir-146a-5p | protein_coding | PRINCIPAL | false | 489 | 507 | 1.20902997528032 | 1 | 2 | Miranda|8mer|489|507|1.20902997528032| |
| BRCA1 | hsa-mir-329-5p | ENST00000357654 | hsa-mir-329-5p | protein_coding | PRINCIPAL | false | 559 | 579 | 1.12675096317469 | 1 | 0 | Miranda|6mer|559|579|1.12675096317469| |
| BRCA1 | hsa-mir-616-3p | ENST00000357654 | hsa-mir-616-3p | protein_coding | PRINCIPAL | false | 976 | 982 | -0.868240817013203 | 1 | 0 | Pita|8mer|976|982|-0.868240817013203| |
| BRCA1 | hsa-mir-616-3p | ENST00000357654 | hsa-mir-616-3p | protein_coding | PRINCIPAL | false | 426 | 447 | 1.12675096317469 | 1 | 0 | Miranda|N/A|426|447|1.12675096317469| |
| BRCA1 | hsa-mir-342-5p | ENST00000357654 | hsa-mir-342-5p | protein_coding | PRINCIPAL | false | 806 | 827 | 1.0718982884376 | 1 | 0 | Miranda|N/A|806|827|1.0718982884376| |
| BRCA1 | hsa-mir-141-3p | ENST00000357654 | hsa-mir-141-3p | protein_coding | PRINCIPAL | false | 982 | 988 | -0.867719716603201 | 1 | 0 | Pita|8mer|982|988|-0.867719716603201| |
| BRCA1 | hsa-mir-936 | ENST00000357654 | hsa-mir-936 | protein_coding | PRINCIPAL | false | 83 | 105 | 1.30502215607023 | 1 | 0 | Miranda|7mer-m8|83|105|1.30502215607023| |
| BRCA1 | hsa-mir-488-3p | ENST00000357654 | hsa-mir-488-3p | protein_coding | PRINCIPAL | false | 45 | 65 | 1.08561145712188 | 1 | 0 | Miranda|Offset 3-8 6mer|45|65|1.08561145712188| |
| BRCA1 | hsa-mir-132-3p | ENST00000357654 | hsa-mir-132-3p | protein_coding | PRINCIPAL | false | 1228 | 1249 | 1.14046413185896 | 1 | 0 | Miranda|7mer-m8|1228|1249|1.14046413185896| |
| BRCA1 | hsa-mir-215-3p | ENST00000357654 | hsa-mir-215-3p | protein_coding | PRINCIPAL | false | 1083 | 1104 | 1.30502215607023 | 1 | 0 | Miranda|8mer|1083|1104|1.30502215607023| |
| BRCA1 | hsa-mir-623 | ENST00000357654 | hsa-mir-623 | protein_coding | PRINCIPAL | false | 1275 | 1301 | 1.04447195106906 | 1 | 0 | Miranda|Offset 3-8 6mer|1275|1301|1.04447195106906| |
| BRCA1 | hsa-mir-151a-5p | ENST00000357654 | hsa-mir-151a-5p | protein_coding | PRINCIPAL | false | 64 | 84 | 1.14046413185896 | 1 | 0 | Miranda|Offset 3-8 6mer|64|84|1.14046413185896| |
| BRCA1 | hsa-mir-892b | ENST00000357654 | hsa-mir-892b | protein_coding | PRINCIPAL | false | 696 | 717 | 1.19531680659605 | 1 | 0 | Miranda|N/A|696|717|1.19531680659605| |

**Suppl_table 3**: Results of prediction of interaction between miRNAs from literature and 3’UTR of *BRCA1*

| Input Gene | Input Mirna | Transcript | Mirna | biotype | ENCODE isoform | Amplified UTR | Start | Stop | Agreement | Computational Predictions | Confirmed Predictions | Computational Predictions (method|target-site|start|stop|score) |
| --- | --- | --- | --- | --- | --- | --- | --- | --- | --- | --- | --- | --- |
| BRCA1 | hsa-mir-103b | ENST00000357654 | hsa-mir-103b | protein_coding | PRINCIPAL | false | 137 | 159 | 1.04447195106906 | 1 | 0 | Miranda|7mer-m8|137|159|1.04447195106906| |
| BRCA1 | hsa-mir-15a-3p | ENST00000357654 | hsa-mir-15a-3p | protein_coding | PRINCIPAL | false | 38 | 61 | 1.08561145712188 | 1 | 0 | Miranda|6mer|38|61|1.08561145712188| |
| BRCA1 | hsa-mir-15a-3p | ENST00000357654 | hsa-mir-15a-3p | protein_coding | PRINCIPAL | false | 340 | 361 | 1.08561145712188 | 1 | 0 | Miranda|6mer+|340|361|1.08561145712188| |
| BRCA1 | hsa-mir-208b-3p | ENST00000357654 | hsa-mir-208b-3p | protein_coding | PRINCIPAL | false | 386 | 392 | -0.876285647421831 | 1 | 0 | Targetscan|7mer-1A|386|392|-0.876285647421831| |
| BRCA1 | hsa-mir-28-5p | ENST00000357654 | hsa-mir-28-5p | protein_coding | PRINCIPAL | false | 61 | 82 | 1.27759581870169 | 1 | 0 | Miranda|7mer-m8|61|82|1.27759581870169| |
| BRCA1 | hsa-mir-645 | ENST00000357654 | hsa-mir-645 | protein_coding | PRINCIPAL | false | 817 | 834 | 1.08561145712188 | 1 | 0 | Miranda|N/A|817|834|1.08561145712188| |
| BRCA1 | hsa-mir-92a-2-5p | ENST00000357654 | hsa-mir-92a-2-5p | protein_coding | PRINCIPAL | false | 1094 | 1112 | 1.08561145712188 | 1 | 0 | Miranda|7mer-1A|1094|1112|1.08561145712188| |
| BRCA1 | hsa-mir-92a-2-5p | ENST00000357654 | hsa-mir-92a-2-5p | protein_coding | PRINCIPAL | false | 668 | 689 | 1.04447195106906 | 1 | 0 | Miranda|N/A|668|689|1.04447195106906| |
| BRCA1 | hsa-mir-15b-5p | ENST00000357654 | hsa-mir-15b-5p | protein_coding | PRINCIPAL | false | 1328 | 1349 | 1.12675096317469 | 1 | 0 | Miranda|N/A|1328|1349|1.12675096317469| |
| BRCA1 | hsa-mir-29b-2-5p | ENST00000357654 | hsa-mir-29b-2-5p | protein_coding | PRINCIPAL | false | 640 | 685 | 1.21588655962246 | 2 | 0 | Miranda|Offset 3-8 6mer|663|685|1.23645631264887| |
| BRCA1 | hsa-mir-29b-2-5p | ENST00000357654 | hsa-mir-29b-2-5p | protein_coding | PRINCIPAL | false | 1153 | 1175 | 1.15417730054324 | 1 | 0 | Miranda|7mer-m8|1153|1175|1.15417730054324| |
| BRCA1 | hsa-mir-93-5p | ENST00000357654 | hsa-mir-93-5p | protein_coding | PRINCIPAL | false | 593 | 615 | 1.38730116817586 | 1 | 0 | Miranda|7mer-m8|593|615|1.38730116817586| |
| BRCA1 | hsa-mir-372-3p | ENST00000357654 | hsa-mir-372-3p | protein_coding | PRINCIPAL | false | 587 | 614 | 1.25016948133314 | 1 | 0 | Miranda|7mer-m8|587|614|1.25016948133314| |
| BRCA1 | hsa-mir-146a-5p | ENST00000357654 | hsa-mir-146a-5p | protein_coding | PRINCIPAL | false | 983 | 989 | -0.867719716603201 | 1 | 2 | Pita|8mer|983|989|-0.867719716603201| |
| BRCA1 | hsa-mir-146a-5p | ENST00000357654 | hsa-mir-146a-5p | protein_coding | PRINCIPAL | false | 489 | 507 | 1.20902997528032 | 1 | 2 | Miranda|8mer|489|507|1.20902997528032| |
| BRCA1 | hsa-mir-20b-5p | ENST00000357654 | hsa-mir-20b-5p | protein_coding | PRINCIPAL | false | 593 | 615 | 1.38730116817586 | 1 | 0 | Miranda|7mer-m8|593|615|1.38730116817586| |
| BRCA1 | hsa-mir-212-3p | ENST00000357654 | hsa-mir-212-3p | protein_coding | PRINCIPAL | false | 830 | 851 | 1.15417730054324 | 1 | 1 | Miranda|Offset 3-8 6mer|830|851|1.15417730054324| |
| BRCA1 | hsa-mir-212-3p | ENST00000357654 | hsa-mir-212-3p | protein_coding | PRINCIPAL | false | 1229 | 1249 | 1.14046413185896 | 1 | 1 | Miranda|7mer-m8|1229|1249|1.14046413185896| |
| BRCA1 | hsa-mir-9-5p | ENST00000357654 | hsa-mir-9-5p | protein_coding | PRINCIPAL | false | 975 | 980 | -0.868405375037414 | 1 | 0 | Pita|6mer|975|980|-0.868405375037414| |
| BRCA1 | hsa-mir-429 | ENST00000357654 | hsa-mir-429 | protein_coding | PRINCIPAL | false | 982 | 988 | -0.867719716603201 | 1 | 0 | Pita|8mer|982|988|-0.867719716603201| |
| BRCA1 | hsa-mir-190a-3p | ENST00000357654 | hsa-mir-190a-3p | protein_coding | PRINCIPAL | false | 1023 | 1043 | 1.05818511975333 | 1 | 0 | Miranda|7mer-1A|1023|1043|1.05818511975333| |
| BRCA1 | hsa-mir-106a-5p | ENST00000357654 | hsa-mir-106a-5p | protein_coding | PRINCIPAL | false | 593 | 615 | 1.38730116817586 | 1 | 0 | Miranda|7mer-m8|593|615|1.38730116817586| |
| BRCA1 | hsa-mir-383-5p | ENST00000357654 | hsa-mir-383-5p | protein_coding | PRINCIPAL | false | 988 | 994 | -0.868158538001097 | 1 | 0 | Pita|8mer|988|994|-0.868158538001097| |
| BRCA1 | hsa-mir-26a-1-3p | ENST00000357654 | hsa-mir-26a-1-3p | protein_coding | PRINCIPAL | false | 468 | 491 | 1.19531680659605 | 1 | 0 | Miranda|7mer-m8|468|491|1.19531680659605| |
| BRCA1 | hsa-mir-26a-1-3p | ENST00000357654 | hsa-mir-26a-1-3p | protein_coding | PRINCIPAL | false | 356 | 377 | 1.05818511975333 | 1 | 0 | Miranda|7mer-m8|356|377|1.05818511975333| |
| BRCA1 | hsa-mir-520g-3p | ENST00000357654 | hsa-mir-520g-3p | protein_coding | PRINCIPAL | false | 594 | 616 | 1.19531680659605 | 1 | 0 | Miranda|7mer-m8|594|616|1.19531680659605| |
| BRCA1 | hsa-mir-218-5p | ENST00000357654 | hsa-mir-218-5p | protein_coding | PRINCIPAL | false | 328 | 352 | 1.20902997528032 | 1 | 0 | Miranda|7mer-m8|328|352|1.20902997528032| |
| BRCA1 | hsa-mir-125a-3p | ENST00000357654 | hsa-mir-125a-3p | protein_coding | PRINCIPAL | false | 220 | 241 | 1.0718982884376 | 1 | 0 | Miranda|8mer|220|241|1.0718982884376| |
| BRCA1 | hsa-mir-150-5p | ENST00000357654 | hsa-mir-150-5p | protein_coding | PRINCIPAL | false | 599 | 620 | 1.04447195106906 | 1 | 0 | Miranda|7mer-m8|599|620|1.04447195106906| |
| BRCA1 | hsa-mir-29b-1-5p | ENST00000357654 | hsa-mir-29b-1-5p | protein_coding | PRINCIPAL | false | 639 | 663 | 1.20902997528032 | 1 | 0 | Miranda|7mer-m8|639|663|1.20902997528032| |
| BRCA1 | hsa-mir-29b-1-5p | ENST00000357654 | hsa-mir-29b-1-5p | protein_coding | PRINCIPAL | false | 866 | 889 | 1.11303779449042 | 1 | 0 | Miranda|N/A|866|889|1.11303779449042| |
| BRCA1 | hsa-mir-526b-3p | ENST00000357654 | hsa-mir-526b-3p | protein_coding | PRINCIPAL | false | 595 | 615 | 1.12675096317469 | 1 | 0 | Miranda|7mer-m8|595|615|1.12675096317469| |
| BRCA1 | hsa-mir-520d-3p | ENST00000357654 | hsa-mir-520d-3p | protein_coding | PRINCIPAL | false | 593 | 614 | 1.04447195106906 | 1 | 0 | Miranda|7mer-m8|593|614|1.04447195106906| |
| BRCA1 | hsa-mir-365a-5p | ENST00000357654 | hsa-mir-365a-5p | protein_coding | PRINCIPAL | false | 172 | 194 | 1.09932462580615 | 1 | 0 | Miranda|N/A|172|194|1.09932462580615| |
| BRCA1 | hsa-mir-328-5p | ENST00000357654 | hsa-mir-328-5p | protein_coding | PRINCIPAL | false | 1264 | 1287 | 0.27122787343157206 | 2 | 0 | Rnahybrid|Offset 1-7 7mer-m8|1279|1286|-0.872764901067494| |
| BRCA1 | hsa-mir-100-3p | ENST00000357654 | hsa-mir-100-3p | protein_coding | PRINCIPAL | false | 982 | 988 | -0.867719716603201 | 1 | 0 | Pita|8mer|982|988|-0.867719716603201| |
| BRCA1 | hsa-mir-302a-3p | ENST00000357654 | hsa-mir-302a-3p | protein_coding | PRINCIPAL | false | 593 | 614 | 1.08561145712188 | 1 | 0 | Miranda|7mer-m8|593|614|1.08561145712188| |
| BRCA1 | hsa-mir-302a-3p | ENST00000357654 | hsa-mir-302a-3p | protein_coding | PRINCIPAL | false | 753 | 776 | 1.04447195106906 | 1 | 0 | Miranda|N/A|753|776|1.04447195106906| |
| BRCA1 | hsa-mir-200a-3p | ENST00000357654 | hsa-mir-200a-3p | protein_coding | PRINCIPAL | false | 982 | 988 | -0.867719716603201 | 1 | 0 | Pita|8mer|982|988|-0.867719716603201| |
| BRCA1 | hsa-mir-520a-3p | ENST00000357654 | hsa-mir-520a-3p | protein_coding | PRINCIPAL | false | 593 | 614 | 1.04447195106906 | 1 | 0 | Miranda|7mer-m8|593|614|1.04447195106906| |
| BRCA1 | hsa-mir-760 | ENST00000357654 | hsa-mir-760 | protein_coding | PRINCIPAL | false | 8 | 27 | 1.44215384291295 | 1 | 0 | Miranda|8mer|8|27|1.44215384291295| |
| BRCA1 | hsa-mir-199a-5p | ENST00000357654 | hsa-mir-199a-5p | protein_coding | PRINCIPAL | false | 620 | 642 | 1.08561145712188 | 1 | 0 | Miranda|7mer-1A|620|642|1.08561145712188| |
| BRCA1 | hsa-mir-95-5p | ENST00000357654 | hsa-mir-95-5p | protein_coding | PRINCIPAL | false | 1005 | 1025 | 1.16789046922751 | 1 | 0 | Miranda|7mer-m8|1005|1025|1.16789046922751| |
| BRCA1 | hsa-mir-30e-3p | ENST00000357654 | hsa-mir-30e-3p | protein_coding | PRINCIPAL | false | 122 | 143 | 1.04447195106906 | 1 | 0 | Miranda|7mer-1A|122|143|1.04447195106906| |
| BRCA1 | hsa-mir-34a-3p | ENST00000357654 | hsa-mir-34a-3p | protein_coding | PRINCIPAL | false | 271 | 291 | 1.14046413185896 | 1 | 0 | Miranda|7mer-m8|271|291|1.14046413185896| |
| BRCA1 | hsa-mir-424-3p | ENST00000357654 | hsa-mir-424-3p | protein_coding | PRINCIPAL | false | 1312 | 1332 | 1.05818511975333 | 1 | 0 | Miranda|7mer-m8|1312|1332|1.05818511975333| |
| BRCA1 | hsa-mir-483-3p | ENST00000357654 | hsa-mir-483-3p | protein_coding | PRINCIPAL | false | 634 | 654 | 1.12675096317469 | 1 | 0 | Miranda|Offset 3-8 6mer|634|654|1.12675096317469| |
| BRCA1 | hsa-mir-106b-5p | ENST00000357654 | hsa-mir-106b-5p | protein_coding | PRINCIPAL | false | 595 | 615 | 1.41472750554441 | 1 | 0 | Miranda|7mer-m8|595|615|1.41472750554441| |
| BRCA1 | hsa-let-7c-3p | ENST00000357654 | hsa-let-7c-3p | protein_coding | PRINCIPAL | false | 1303 | 1321 | 1.15417730054324 | 1 | 0 | Miranda|8mer|1303|1321|1.15417730054324| |
| BRCA1 | hsa-mir-186-5p | ENST00000357654 | hsa-mir-186-5p | protein_coding | PRINCIPAL | false | 294 | 315 | 1.04447195106906 | 1 | 1 | Miranda|7mer-m8|294|315|1.04447195106906| |
| BRCA1 | hsa-mir-373-3p | ENST00000357654 | hsa-mir-373-3p | protein_coding | PRINCIPAL | false | 591 | 614 | 1.37358799949159 | 1 | 0 | Miranda|7mer-m8|591|614|1.37358799949159| |
| BRCA1 | hsa-mir-335-3p | ENST00000357654 | hsa-mir-335-3p | protein_coding | PRINCIPAL | false | 542 | 564 | 1.34616166212305 | 1 | 0 | Miranda|7mer-m8|542|564|1.34616166212305| |
| BRCA1 | hsa-mir-193b-5p | ENST00000357654 | hsa-mir-193b-5p | protein_coding | PRINCIPAL | false | 388 | 410 | 1.08561145712188 | 1 | 0 | Miranda|N/A|388|410|1.08561145712188| |
| BRCA1 | hsa-mir-193b-5p | ENST00000357654 | hsa-mir-193b-5p | protein_coding | PRINCIPAL | false | 665 | 686 | 1.0718982884376 | 1 | 0 | Miranda|8mer|665|686|1.0718982884376| |
| BRCA1 | hsa-mir-499b-5p | ENST00000357654 | hsa-mir-499b-5p | protein_coding | PRINCIPAL | false | 889 | 909 | 1.14046413185896 | 1 | 0 | Miranda|8mer|889|909|1.14046413185896| |
| BRCA1 | hsa-mir-204-3p | ENST00000357654 | hsa-mir-204-3p | protein_coding | PRINCIPAL | false | 47 | 67 | 1.05818511975333 | 1 | 0 | Miranda|N/A|47|67|1.05818511975333| |
| BRCA1 | hsa-mir-520c-3p | ENST00000357654 | hsa-mir-520c-3p | protein_coding | PRINCIPAL | false | 594 | 614 | 1.12675096317469 | 1 | 0 | Miranda|7mer-m8|594|614|1.12675096317469| |
| BRCA1 | hsa-mir-212-5p | ENST00000357654 | hsa-mir-212-5p | protein_coding | PRINCIPAL | false | 603 | 627 | 1.34616166212305 | 1 | 0 | Miranda|7mer-m8|603|627|1.34616166212305| |
| BRCA1 | hsa-mir-623 | ENST00000357654 | hsa-mir-623 | protein_coding | PRINCIPAL | false | 1275 | 1301 | 1.04447195106906 | 1 | 0 | Miranda|Offset 3-8 6mer|1275|1301|1.04447195106906| |
| BRCA1 | hsa-mir-378a-5p | ENST00000357654 | hsa-mir-378a-5p | protein_coding | PRINCIPAL | false | 628 | 651 | 1.34616166212305 | 1 | 0 | Miranda|7mer-m8|628|651|1.34616166212305| |
| BRCA1 | hsa-mir-302c-3p | ENST00000357654 | hsa-mir-302c-3p | protein_coding | PRINCIPAL | false | 594 | 614 | 1.11303779449042 | 1 | 0 | Miranda|7mer-m8|594|614|1.11303779449042| |
| BRCA1 | hsa-mir-208a-5p | ENST00000357654 | hsa-mir-208a-5p | protein_coding | PRINCIPAL | false | 386 | 392 | -0.8764303213514502 | 1 | 0 | Targetscan|7mer-1A|386|392|-0.87643032135145| |
| BRCA1 | hsa-mir-208a-3p | ENST00000357654 | hsa-mir-208a-3p | protein_coding | PRINCIPAL | false | 386 | 392 | -0.876140973492212 | 1 | 0 | Targetscan|7mer-1A|386|392|-0.876140973492212| |
| BRCA1 | hsa-mir-7-5p | ENST00000357654 | hsa-mir-7-5p | protein_coding | PRINCIPAL | false | 984 | 990 | -0.867747142940569 | 1 | 0 | Pita|8mer|984|990|-0.867747142940569| |
| BRCA1 | hsa-mir-7-5p | ENST00000357654 | hsa-mir-7-5p | protein_coding | PRINCIPAL | false | 1254 | 1277 | 1.29130898738596 | 1 | 0 | Miranda|7mer-m8|1254|1277|1.29130898738596| |
| BRCA1 | hsa-mir-512-3p | ENST00000357654 | hsa-mir-512-3p | protein_coding | PRINCIPAL | false | 592 | 613 | 1.16789046922751 | 1 | 0 | Miranda|7mer-m8|592|613|1.16789046922751| |
| BRCA1 | hsa-mir-335-5p | ENST00000357654 | hsa-mir-335-5p | protein_coding | PRINCIPAL | false | 1015 | 1037 | 1.11303779449042 | 1 | 2 | Miranda|N/A|1015|1037|1.11303779449042| |
| BRCA1 | hsa-mir-208b-5p | ENST00000357654 | hsa-mir-208b-5p | protein_coding | PRINCIPAL | false | 386 | 392 | -0.876285647421831 | 1 | 0 | Targetscan|7mer-1A|386|392|-0.876285647421831| |
| BRCA1 | hsa-mir-146b-5p | ENST00000357654 | hsa-mir-146b-5p | protein_coding | PRINCIPAL | false | 983 | 989 | -0.867719716603201 | 1 | 1 | Pita|8mer|983|989|-0.867719716603201| |
| BRCA1 | hsa-mir-146b-5p | ENST00000357654 | hsa-mir-146b-5p | protein_coding | PRINCIPAL | false | 490 | 507 | 1.18160363791178 | 1 | 1 | Miranda|8mer|490|507|1.18160363791178| |
| BRCA1 | hsa-mir-20a-5p | ENST00000357654 | hsa-mir-20a-5p | protein_coding | PRINCIPAL | false | 593 | 615 | 1.38730116817586 | 1 | 0 | Miranda|7mer-m8|593|615|1.38730116817586| |
| BRCA1 | hsa-mir-186-3p | ENST00000357654 | hsa-mir-186-3p | protein_coding | PRINCIPAL | false | 594 | 618 | 1.05818511975333 | 1 | 0 | Miranda|8mer|594|618|1.05818511975333| |
| BRCA1 | hsa-mir-99b-3p | ENST00000357654 | hsa-mir-99b-3p | protein_coding | PRINCIPAL | false | 29 | 49 | 1.23645631264887 | 1 | 1 | Miranda|7mer-1A|29|49|1.23645631264887| |
| BRCA1 | hsa-mir-30a-5p | ENST00000357654 | hsa-mir-30a-5p | protein_coding | PRINCIPAL | false | 1230 | 1252 | 1.0718982884376 | 1 | 0 | Miranda|N/A|1230|1252|1.0718982884376| |
| BRCA1 | hsa-mir-337-5p | ENST00000357654 | hsa-mir-337-5p | protein_coding | PRINCIPAL | false | 1239 | 1259 | 1.04447195106906 | 1 | 0 | Miranda|N/A|1239|1259|1.04447195106906| |
| BRCA1 | hsa-mir-16-2-3p | ENST00000357654 | hsa-mir-16-2-3p | protein_coding | PRINCIPAL | false | 494 | 515 | 1.04447195106906 | 1 | 0 | Miranda|N/A|494|515|1.04447195106906| |
| BRCA1 | hsa-mir-708-5p | ENST00000357654 | hsa-mir-708-5p | protein_coding | PRINCIPAL | false | 60 | 82 | 1.15417730054324 | 1 | 0 | Miranda|7mer-m8|60|82|1.15417730054324| |
| BRCA1 | hsa-mir-365b-5p | ENST00000357654 | hsa-mir-365b-5p | protein_coding | PRINCIPAL | false | 173 | 194 | 1.04447195106906 | 1 | 0 | Miranda|N/A|173|194|1.04447195106906| |
| BRCA1 | hsa-mir-342-5p | ENST00000357654 | hsa-mir-342-5p | protein_coding | PRINCIPAL | false | 806 | 827 | 1.0718982884376 | 1 | 0 | Miranda|N/A|806|827|1.0718982884376| |
| BRCA1 | hsa-mir-17-5p | ENST00000357654 | hsa-mir-17-5p | protein_coding | PRINCIPAL | false | 593 | 615 | 1.38730116817586 | 1 | 1 | Miranda|7mer-m8|593|615|1.38730116817586| |
| BRCA1 | hsa-mir-141-3p | ENST00000357654 | hsa-mir-141-3p | protein_coding | PRINCIPAL | false | 982 | 988 | -0.867719716603201 | 1 | 0 | Pita|8mer|982|988|-0.867719716603201| |
| BRCA1 | hsa-mir-22-5p | ENST00000357654 | hsa-mir-22-5p | protein_coding | PRINCIPAL | false | 1192 | 1214 | 1.05818511975333 | 1 | 0 | Miranda|Offset 3-8 6mer|1192|1214|1.05818511975333| |
| BRCA1 | hsa-mir-516a-3p | ENST00000357654 | hsa-mir-516a-3p | protein_coding | PRINCIPAL | false | 1106 | 1123 | 1.2227431439646 | 1 | 0 | Miranda|7mer-m8|1106|1123|1.2227431439646| |
| BRCA1 | hsa-mir-769-3p | ENST00000357654 | hsa-mir-769-3p | protein_coding | PRINCIPAL | false | 1088 | 1110 | 1.11303779449042 | 1 | 0 | Miranda|7mer-m8|1088|1110|1.11303779449042| |
| BRCA1 | hsa-mir-26a-2-3p | ENST00000357654 | hsa-mir-26a-2-3p | protein_coding | PRINCIPAL | false | 471 | 491 | 1.14046413185896 | 1 | 0 | Miranda|7mer-m8|471|491|1.14046413185896| |
| BRCA1 | hsa-mir-26a-2-3p | ENST00000357654 | hsa-mir-26a-2-3p | protein_coding | PRINCIPAL | false | 354 | 377 | 1.0718982884376 | 1 | 0 | Miranda|7mer-m8|354|377|1.0718982884376| |
| BRCA1 | hsa-mir-345-5p | ENST00000357654 | hsa-mir-345-5p | protein_coding | PRINCIPAL | false | 413 | 434 | 1.12675096317469 | 1 | 0 | Miranda|8mer|413|434|1.12675096317469| |
| BRCA1 | hsa-mir-106b-3p | ENST00000357654 | hsa-mir-106b-3p | protein_coding | PRINCIPAL | false | 1273 | 1294 | 1.0718982884376 | 1 | 0 | Miranda|N/A|1273|1294|1.0718982884376| |

**Suppl_table 4**: Clinicopathological data of the different women with BC harboring 3´UTR germline variants in *BRCA1* gene.

| **Code** | **Age_at_diagnosis** | **Histologic_diagnosis** | **ER_status** | **PR_status** | **HER-2_status** | **TNBC_status** | **BMI** |
| --- | --- | --- | --- | --- | --- | --- | --- |
| Bta-BraC016 | 61 | ductal | positive | positive | positive | negative | 24.8 |
| Cali-BraC040 | 38 | lobular | positive | positive | negative | negative | 26.5 |
| HUM-BRAC046 | 28 | ductal | negative | negative | positive | negative | 21.3 |
| Mde-BraC012 | 29 | ductal | negative | negative | positive | negative | 30.4 |

ER Estrogen Receptor PR: Progesterone Receptor HER-2 Human Epidermal Growth Factor Receptor 2 TNBC. Triple Negative Breast Cancer BMI: Body Mass Index (kg/m2)


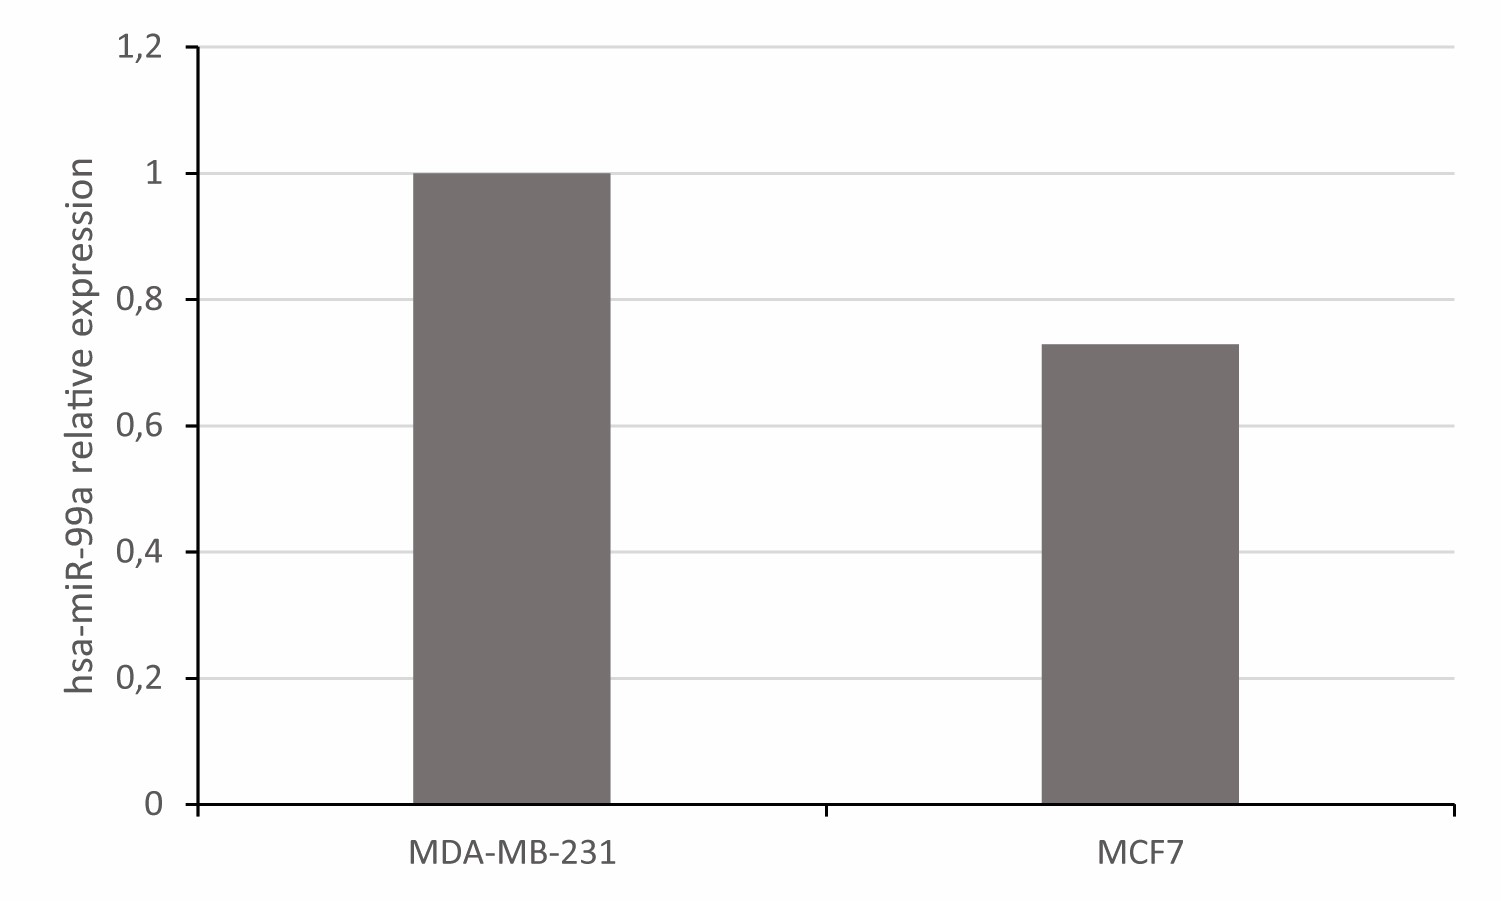


**Suppl_Fig1**: Expression level of miR-99a-3p in MDA-MB-231 and MCF-7 cell lines from comparison between GSE146477 from GEO database (<https://www.ncbi.nlm.nih.gov/geo/>).
